# Supplementary material for: An improved multiple-locus variable-number of tandem repeat analysis (MLVA) for the fish pathogen Francisella noatunensis using capillary electrophoresis
Source: PubMed Central journal article supplement (PMC3878797; doi:10.1186/1746-6148-9-252), 2013-12-13
Supplement: 1746-6148-9-252-S1.pdf [file 1746-6148-9-252-S1.pdf]

| Strain/isolate | Year | Host/source       | Province/county           | Country     | Allele-string | MLVA type | PFGE type |
|----------------|------|-------------------|---------------------------|-------------|---------------|-----------|-----------|
| 5409           | 2008 | Tilapia           | Costa Rica                | Costa Rica  | 23-0-0-0-0    | 16        | H         |
| 5887           | 2001 | Three-lined grunt | Uwajima, Ehime prefecture | Japan       | 23-8-10-0-0   | 16        | H         |
| CCUG13         | 1979 | Human             | Zurich                    | Switzerland | 32-8-0-0-0    | 20        | K         |
| CCUG12         | 1959 | moribund muskrat  | Brigham City, Utah        | USA         | 28-0-4-0-0    | 19        | J         |
| CCUG19         | 1980 | Water             | Utah                      | USA         | 25-0-10-0-0   | 18        | I         |
| 5888           | 2008 | Atlantic salmon   | Lake Llanquihue           | Chile       | 23-32-10-0-15 | 14        | F         |
| 7081           | 2009 | Atlantic ood      | Waterford                 | Ireland     | 28-32-10-6-15 | 15        | G         |
| 6062           | 2008 | Atlantic ood      | Møre og Romsdal           | Norway      | 20-14-7-4-31  | 11        |           |
| 6063           | 2008 | Atlantic ood      | Møre og Romsdal           | Norway      | 20-14-7-4-31  | 11        | D         |
| 6213           | 2008 | Atlantic ood      | Møre og Romsdal           | Norway      | 20-14-7-4-31  | 11        |           |
| 6214           | 2008 | Atlantic ood      | Møre og Romsdal           | Norway      | 20-14-7-4-31  | 11        | D         |
| 5590           | 2006 | Atlantic ood      | Møre og Romsdal           | Norway      | 20-14-7-4-30  | 10        |           |
| 5591           | 2006 | Atlantic ood      | Møre og Romsdal           | Norway      | 20-14-7-4-30  | 10        |           |
| 5592           | 2006 | Atlantic ood      | Møre og Romsdal           | Norway      | 20-14-7-4-30  | 10        | D         |
| 5593           | 2006 | Atlantic ood      | Møre og Romsdal           | Norway      | 20-14-7-4-30  | 10        | D         |
| 5594           | 2006 | Atlantic ood      | Møre og Romsdal           | Norway      | 20-14-7-4-30  | 10        | D         |
| 5949           | 2007 | Atlantic ood      | Møre og Romsdal           | Norway      | 20-14-7-4-30  | 10        | D         |
| 5950           | 2007 | Atlantic ood      | Møre og Romsdal           | Norway      | 20-14-7-4-30  | 10        |           |
| 6009           | 2007 | Atlantic ood      | Møre og Romsdal           | Norway      | 20-14-7-4-30  | 10        |           |
| 6065           | 2008 | Atlantic ood      | Møre og Romsdal           | Norway      | 20-14-7-4-30  | 10        | D         |
| 6154           | 2008 | Atlantic ood      | Møre og Romsdal           | Norway      | 20-14-7-4-30  | 10        |           |
| 6215           | 2008 | Atlantic ood      | Møre og Romsdal           | Norway      | 20-14-7-4-30  | 10        |           |
| 5331           | 2005 | Atlantic ood      | Hordaland                 | Norway      | 31-14-8-7-15  | 9         |           |
| 5509           | 2006 | Atlantic ood      | VI-Bergen                 | Norway      | 31-14-8-7-15  | 9         |           |
| 5511           | 2006 | Atlantic ood      | VI-Bergen                 | Norway      | 31-14-8-7-15  | 9         |           |
| 5518           | 2006 | Atlantic ood      | Southern Skagerrak        | Sweden      | 31-14-8-7-15  | 9         |           |
| 5953           | 2007 | Atlantic ood      | Troms                     | Norway      | 31-14-8-7-15  | 9         |           |
| 5954           | 2007 | Atlantic ood      | Troms                     | Norway      | 31-14-8-7-15  | 9         |           |
| 5955           | 2007 | Atlantic ood      | Sogn og Fjordane          | Norway      | 31-14-8-7-15  | 9         | B         |
| 6278           | 2008 | Atlantic ood      | Tromsø Univ               | Norway      | 31-14-8-7-15  | 9         |           |
| 6280           | 2008 | Atlantic ood      | Tromsø Univ               | Norway      | 31-14-8-7-15  | 9         |           |
| 6281           | 2008 | Atlantic ood      | Troms                     | Norway      | 31-14-8-7-15  | 9         |           |
| 6567           | 2008 | Atlantic ood      | Sogn og Fjordane          | Norway      | 31-14-8-7-15  | 9         | B         |
| 6568           | 2008 | Atlantic ood      | Sogn og Fjordane          | Norway      | 31-14-8-7-15  | 9         |           |
| 6569           | 2008 | Atlantic ood      | Sogn og Fjordane          | Norway      | 31-14-8-7-15  | 9         | B         |
| 6570           | 2008 | Atlantic ood      | Sogn og Fjordane          | Norway      | 31-14-8-7-15  | 9         | B         |
| 6571           | 2008 | Atlantic ood      | Sogn og Fjordane          | Norway      | 31-14-8-7-15  | 9         | B         |
| 6573           | 2008 | Atlantic ood      | Sogn og Fjordane          | Norway      | 31-14-8-7-15  | 9         | B         |
| 6574           | 2008 | Atlantic ood      | Sogn og Fjordane          | Norway      | 31-14-8-7-15  | 9         | B         |
| 6575           | 2008 | Atlantic ood      | Sogn og Fjordane          | Norway      | 31-14-8-7-15  | 9         |           |
| 6576           | 2008 | Atlantic ood      | Sogn og Fjordane          | Norway      | 31-14-8-7-15  | 9         | B         |
| 7119           | 2009 | Atlantic ood      | VI-Bergen                 | Norway      | 31-14-8-7-15  | 9         | B         |
| 7123           | 2007 | Atlantic ood      | Sogn og Fjordane          | Norway      | 31-14-8-7-15  | 9         | B         |
| 7125           | 2007 | Atlantic ood      | Sogn og Fjordane          | Norway      | 31-14-8-7-15  | 9         | B         |
| 7128           | 2008 | Atlantic ood      | Sogn og Fjordane          | Norway      | 31-14-8-7-15  | 9         |           |
| 7129           | 2008 | Atlantic ood      | Sogn og Fjordane          | Norway      | 31-14-8-7-15  | 9         |           |
| NCIMB1         | 2005 | Atlantic ood      | Hordaland                 | Norway      | 31-14-8-7-15  | 9         | C         |
| 6572           | 2008 | Atlantic ood      | Sogn og Fjordane          | Norway      | 32-14-8-7-15  | 12        | B         |
| 6577           | 2008 | Atlantic ood      | Sogn og Fjordane          | Norway      | 31-14-9-7-15  | 13        | B         |

|      |      |              |                  |        |              |   |   |
|------|------|--------------|------------------|--------|--------------|---|---|
| 6472 | 2008 | Atlantic cod | Møre og Romsdal  | Norway | 33-8-11-4-10 | 5 |   |
| 6496 | 2008 | Atlantic cod | nd               | Norway | 33-8-11-4-10 | 5 | A |
| 7127 | 2008 | Atlantic cod | Rogaland         | Norway | 33-8-11-4-10 | 5 | A |
| 5358 | 2005 | Atlantic cod | Rogaland         | Norway | 32-8-9-6-10  | 6 | A |
| 5359 | 2005 | Atlantic cod | Rogaland         | Norway | 32-8-9-6-10  | 6 |   |
| 5360 | 2005 | Atlantic cod | Rogaland         | Norway | 32-8-9-6-10  | 6 | A |
| 6471 | 2008 | Atlantic cod | Møre og Romsdal  | Norway | 32-8-9-6-10  | 6 |   |
| 6476 | 2008 | Atlantic cod | Nordland         | Norway | 32-8-9-6-10  | 6 | A |
| 7126 | 2008 | Atlantic cod | Rogaland         | Norway | 32-8-9-6-10  | 6 |   |
| 5396 | 2006 | Atlantic cod | Rogaland         | Norway | 29-8-10-6-10 | 8 | A |
| 6684 | 2009 | Atlantic cod | Nordland         | Norway | 31-8-10-6-10 | 4 | A |
| 8075 | 2011 | Atlantic cod | Møre og Romsdal  | Norway | 27-8-10-6-10 | 7 | A |
| 8087 | 2011 | Atlantic cod | Møre og Romsdal  | Norway | 27-8-10-6-10 | 7 |   |
| 5336 | 2005 | Atlantic cod | Pharmaq AS       | Norway | 30-8-10-6-10 | 1 |   |
| 5339 | 2005 | Atlantic cod | Sogn og Fjordane | Norway | 30-8-10-6-10 | 1 | A |
| 5340 | 2005 | Atlantic cod | Sogn og Fjordane | Norway | 30-8-10-6-10 | 1 | A |
| 5341 | 2005 | Atlantic cod | Sogn og Fjordane | Norway | 30-8-10-6-10 | 1 | E |
| 5347 | 2005 | Atlantic cod | Pharmaq AS       | Norway | 30-8-10-6-10 | 1 |   |
| 5348 | 2005 | Atlantic cod | Pharmaq AS       | Norway | 30-8-10-6-10 | 1 |   |
| 5350 | 2005 | Atlantic cod | Pharmaq AS       | Norway | 30-8-10-6-10 | 1 | A |
| 5393 | 2006 | Atlantic cod | Rogaland         | Norway | 30-8-10-6-10 | 1 | A |
| 5394 | 2006 | Atlantic cod | Rogaland         | Norway | 30-8-10-6-10 | 1 |   |
| 5395 | 2006 | Atlantic cod | Rogaland         | Norway | 30-8-10-6-10 | 1 | A |
| 5397 | 2006 | Atlantic cod | Rogaland         | Norway | 30-8-10-6-10 | 1 |   |
| 5413 | 2006 | Atlantic cod | Sogn og Fjordane | Norway | 30-8-10-6-10 | 1 |   |
| 6022 | 2007 | Atlantic cod | Nordland         | Norway | 30-8-10-6-10 | 1 |   |
| 6023 | 2007 | Atlantic cod | Nordland         | Norway | 30-8-10-6-10 | 1 |   |
| 6024 | 2007 | Atlantic cod | Nordland         | Norway | 30-8-10-6-10 | 1 |   |
| 6087 | 2008 | Atlantic cod | Sogn og Fjordane | Norway | 30-8-10-6-10 | 1 | A |
| 6088 | 2008 | Atlantic cod | Sogn og Fjordane | Norway | 30-8-10-6-10 | 1 | A |
| 6089 | 2008 | Atlantic cod | Sogn og Fjordane | Norway | 30-8-10-6-10 | 1 | A |
| 6090 | 2008 | Atlantic cod | Sogn og Fjordane | Norway | 30-8-10-6-10 | 1 | A |
| 6091 | 2008 | Atlantic cod | Sogn og Fjordane | Norway | 30-8-10-6-10 | 1 | A |
| 6337 | 2008 | Atlantic cod | nd               | Norway | 30-8-10-6-10 | 1 |   |
| 6420 | 2008 | Atlantic cod | Møre og Romsdal  | Norway | 30-8-10-6-10 | 1 | A |
| 6682 | 2009 | Atlantic cod | Nordland         | Norway | 30-8-10-6-10 | 1 | A |
| 6683 | 2009 | Atlantic cod | Nordland         | Norway | 30-8-10-6-10 | 1 | A |
| 6685 | 2009 | Atlantic cod | Nordland         | Norway | 30-8-10-6-10 | 1 |   |
| 6686 | 2009 | Atlantic cod | Nordland         | Norway | 30-8-10-6-10 | 1 | A |
| 6689 | 2009 | Atlantic cod | VESQVIKAN        | Norway | 30-8-10-6-10 | 1 |   |
| 7621 | 2010 | Atlantic cod | Hagersneset      | Norway | 30-8-10-6-10 | 1 |   |
| 7625 | 2010 | Atlantic cod | Hagersneset      | Norway | 30-8-10-6-10 | 1 |   |
| 7667 | 2010 | Atlantic cod | Møre og Romsdal  | Norway | 30-8-10-6-10 | 1 |   |
| 7670 | 2010 | Atlantic cod | Møre og Romsdal  | Norway | 30-8-10-6-10 | 1 |   |
| 5349 | 2005 | Atlantic cod | Pharmaq AS       | Norway | 30-8-10-6-11 | 2 |   |
| 6086 | 2008 | Atlantic cod | Sogn og Fjordane | Norway | 30-8-10-6-11 | 2 | A |
| 6478 | 2008 | Atlantic cod | Sogn og Fjordane | Norway | 30-8-10-6-11 | 2 | A |
| 6479 | 2008 | Atlantic cod | Sogn og Fjordane | Norway | 30-8-10-6-11 | 2 |   |
| 6422 | 2008 | Atlantic cod | Møre og Romsdal  | Norway | 33-10-11-4-9 | 3 | A |
